# Supplementary material for: The Metabolome Atlas of 22 Tissues in Aging Mice Reveals a Switch in Thermogenesis from Brown Fat to Skeletal Muscle
Source: Research Square preprint supplement (doi:10.21203/rs.3.rs-7811947/v1), 2025-10-29
Supplement: Supplementary file 1 [file 18da6d3b744271ee3dd7e689.docx]

**The metabolome atlas of 22 tissues in aging mice reveals a switch in thermogenesis from brown fat to skeletal muscle**

**Authors**

Min Liu1,2, Jian Ji3, Anthony David1, Huaxu Yu1, Tong Shen1, Yuanyue Li1,4, Lydia Yang1,

Oliver Fiehn1,2*

*Corresponding authors: Oliver Fiehn: [ofiehn@ucdavis.edu](mailto:ofiehn@ucdavis.edu)

**Affiliations**

1 West Coast Metabolomics Center, University of California Davis, Davis, CA, 95616, USA

2 Institute for Psychedelics and Neurotherapeutics, University of California, Davis, Davis, CA 95616, USA

3 School of Food Science, State Key Laboratory of Food Science and Technology, National Engineering Research Center for Functional Foods, Synergetic Innovation Center of Food Safety and Nutrition, Jiangnan University, 214122, Wuxi, Jiangsu, P.R. China

4 Department of Hepatobiliary and Pancreatic Surgery, The First Affiliated Hospital, Zhejiang University School of Medicine, Hangzhou, 310012, China

**Outline**

**Supplementary Table 1**. Two-sided Mann-Whitney U tests results (raw and FDR-adjusted) for individual metabolites across tissues

**Supplementary Table 2**. Classification of nascent cardiolipin and mature cardiolipin and maturity score for individual species.

**Supplementary Table 3**. Individual animal metadata used in the aging mouse metabolome atlas.

**Supplementary Table 4**. Experimental MS data for all annotated metabolites.

**Supplementary Note 1.** Cardiolipin maturity score calculation.

**Supplementary Table 2**. Classification of nascent cardiolipin and mature cardiolipin and maturity score for individual species.

| Classification | Annotation | n saturated chain |  |  | DBi | Maturity Score ( |
| --- | --- | --- | --- | --- | --- | --- |
| Nascent CL | CL 66:1 | 4 | 0 | 0 | 1 | 0.1 |
| Nascent CL | CL 66:2; CL 14:0_18:1_16:0_18:1 | 4 | 0 | 0 | 2 | 0.2 |
| Nascent CL | CL 68:2 | 4 | 0 | 0 | 2 | 0.2 |
| Nascent CL | CL 70:2; CL 16:0_18:1_18:0_18:1 | 4 | 0 | 0 | 2 | 0.2 |
| Nascent CL | CL 66:3; CL 16:0_16:1_16:1_18:1 | 4 | 0 | 0 | 3 | 0.3 |
| Nascent CL | CL 70:3; CL 16:0_18:1_18:1_18:1 | 4 | 0 | 0 | 3 | 0.3 |
| Nascent CL | CL 72:3; CL 18:0_18:1_18:1_18:1 | 4 | 0 | 0 | 3 | 0.3 |
| Nascent CL | CL 72:4; CL 18:1_18:1_18:1_18:1 | 4 | 0 | 0 | 4 | 0.4 |
| Nascent CL | CL 74:5; CL 18:0_20:3_18:1_18:1 | 3 | 0 | 1 | 5 | 1 |
| Nascent CL | CL 76:7; CL 18:1_18:1_18:1_22:4 | 3 | 0 | 1 | 7 | 1.2 |
| Nascent CL | CL 68:3; CL 16:0_18:1_16:0_18:2 | 3 | 1 | 0 | 3 | 1.3 |
| Nascent CL | CL 66:4; CL 14:0_18:2_16:1_18:1 | 3 | 1 | 0 | 4 | 1.4 |
| Nascent CL | CL 68:4; CL 16:0_18:2_16:1_18:1 | 3 | 1 | 0 | 4 | 1.4 |
| Nascent CL | CL 68:4; CL 18:1_16:1_18:2_16:0 | 3 | 1 | 0 | 4 | 1.4 |
| Nascent CL | CL 70:4; CL 16:0_18:1_18:1_18:2 | 3 | 1 | 0 | 4 | 1.4 |
| Nascent CL | CL 76:9; CL 18:1_18:1_18:1_22:6 | 3 | 0 | 1 | 9 | 1.4 |
| Nascent CL | CL 68:5; CL 16:1_18:1_16:1_18:2 | 3 | 1 | 0 | 5 | 1.5 |
| Nascent CL | CL 70:5; CL 18:2_18:1_18:1_16:1 | 3 | 1 | 0 | 5 | 1.5 |
| Nascent CL | CL 72:5; CL 18:1_18:1_18:1_18:2 | 3 | 1 | 0 | 5 | 1.5 |
| Nascent CL | CL 76:8; CL 18:1_20:3_18:1_20:3 | 2 | 0 | 2 | 8 | 1.8 |
| Nascent CL | CL 72:9; CL 72:9 | 1~2 | 0~1 | 2 | 9 | 1.9~2.9 |
| Nascent CL | CL 74:10; CL 16:1_20:4_18:1_20:4 | 2 | 0 | 2 | 10 | 2 |
| Nascent CL | CL 74:6; CL 18:0_20:3_18:1_18:2 | 2 | 1 | 1 | 6 | 2.1 |
| Nascent CL | CL 78:11; CL 18:1_20:3_18:1_22:6 | 2 | 0 | 2 | 11 | 2.1 |
| Nascent CL | CL 72:11 |  | 0~1 | 2~3 | 11 | 2.1~3.6 |
| Nascent CL | CL 74:7; CL 18:1_18:2_18:1_20:3 | 2 | 1 | 1 | 7 | 2.2 |
| Nascent CL | CL 78:12; CL 18:1_20:4_18:1_22:6 | 2 | 0 | 2 | 12 | 2.2 |
| Nascent CL | CL 74:12 | 1~2 | 0~2 | 2~3 | 12 | 2.2~4.7 |
| Nascent CL | CL 66:5; CL 14:0_18:2_16:1_18:2 | 2 | 2 | 0 | 5 | 2.5 |
| Nascent CL | CL 68:5; CL 16:0_18:2_16:1_18:2 | 2 | 2 | 0 | 5 | 2.5 |
| Nascent CL | CL 76:10; CL 18:1_18:2_18:1_22:6 | 2 | 1 | 1 | 10 | 2.5 |
| Nascent CL | CL 78:10; CL 18:1_20:3_20:3_20:3 | 1 | 0 | 3 | 10 | 2.5 |
| Nascent CL | CL 68:6; CL 16:1_18:2_16:1_18:2 | 2 | 2 | 0 | 6 | 2.6 |
| Nascent CL | CL 70:6; CL 16:1_18:2_18:1_18:2 | 2 | 2 | 0 | 6 | 2.6 |
| Nascent CL | CL 72:6; CL 18:1_18:2_18:1_18:2 | 2 | 2 | 0 | 6 | 2.6 |
| Nascent CL | CL 72:6; CL 36:3_36:3 | 2 | 2 | 0 | 6 | 2.6 |
| Mature CL | CL 80:13; CL 18:1_22:6_20:3_20:3 | 1 | 0 | 3 | 13 | 2.8 |
| Mature CL | CL 76:9; CL 18:1_20:3_18:2_20:3 | 1 | 1 | 2 | 9 | 2.9 |
| Mature CL | CL 72:10 | 1 | 1, 2 or 2 | 2, 2 or 1 | 10 | 3~4 |
| Mature CL | CL 70:7; | 1 | 2 | 1 | 7 | 3.2 |
| Mature CL | CL 82:17; CL 18:1_22:6_20:4_22:6 | 1 | 0 | 3 | 17 | 3.2 |
| Mature CL | CL 74:8; CL 18:1_18:2_18:2_20:3 | 1 | 2 | 1 | 8 | 3.3 |
| Mature CL | CL 70:8 | 0~1 | 2~3 | 1~1 | 8 | 3.3~4.3 |
| Mature CL | CL 70:9; CL 14:0_18:2_18:2_20:5 | 1 | 2 | 1 | 9 | 3.4 |
| Mature CL | CL 80:14; CL 18:1_22:6_18:2_22:5 | 1 | 1 | 2 | 14 | 3.4 |
| Mature CL | CL 76:10; CL 18:1_18:2_18:2_22:5 | 1 | 2 | 1 | 10 | 3.5 |
| Mature CL | CL 80:15; CL 18:1_22:6_18:2_22:6 | 1 | 1 | 2 | 15 | 3.5 |
| Mature CL | CL 76:11; CL 18:1_18:2_18:2_22:6 | 1 | 2 | 1 | 11 | 3.6 |
| Mature CL | CL 70:7; CL 16:1_18:2_18:2_18:2 | 1 | 3 | 0 | 7 | 3.7 |
| Mature CL | CL 72:7; CL 18:1_18:2_18:2_18:2 | 1 | 3 | 0 | 7 | 3.7 |
| Mature CL | CL 76:12 | 1 | 2~3 | 1~2 | 12 | 3.7~5.2 |
| Mature CL | CL 74:11; CL 18:2_18:2_18:3_20:4 | 0 | 2 | 2 | 11 | 4.1 |
| Mature CL | CL 76:13; CL 18:2_18:2_18:3_22:6 | 0 | 2 | 2 | 13 | 4.3 |
| Mature CL | CL 78:13; CL 18:2_20:3_18:2_22:6 | 0 | 2 | 2 | 13 | 4.3 |
| Mature CL | CL 72:9; CL 18:2_18:2_18:2_18:3 | 0 | 3 | 1 | 9 | 4.4 |
| Mature CL | CL 74:9; CL 18:2_18:2_18:2_20:3 | 0 | 3 | 1 | 9 | 4.4 |
| Mature CL | CL 78:14; CL 18:2_20:4_18:2_22:6 | 0 | 2 | 2 | 14 | 4.4 |
| Mature CL | CL 78:15; CL 18:2_18:2_20:5_22:6 | 0 | 2 | 2 | 15 | 4.5 |
| Mature CL | CL 80:16; CL 18:2_22:6_18:2_22:6 | 0 | 2 | 2 | 16 | 4.6 |
| Mature CL | CL 72:8; CL 18:2_18:2_18:2_18:2 | 0 | 4 | 0 | 8 | 4.8 |

**Supplementary Table 3**. Individual animal metadata used in the aging mouse metabolome atlas.

| **ID** | **Animal ID** | **Body Weight (g)** | **Genotype** | **Genetic Background** | **Sex** | **Age** | **Collection Date** |
| --- | --- | --- | --- | --- | --- | --- | --- |
| 1 | 63434 | 44.67 | WT | C57BL/6NCrl | Female | Week 93 (Nx) | 3/17/2023 |
| 2 | 63435 | 71.23 | WT | C57BL/6NCrl | Female | Week 93 (Nx) | 3/17/2023 |
| 3 | 63622 | 47.03 | WT | C57BL/6NCrl | Female | Week 92 (Nx) | 3/17/2023 |
| 4 | 63614 | 54.54 | WT | C57BL/6NCrl | Female | Week 92 (Nx) | 3/17/2023 |
| 5 | 63615 | 58.27 | WT | C57BL/6NCrl | Female | Week 92 (Nx) | 3/17/2023 |
| 6 | 63694 | 42.24 | WT | C57BL/6NCrl | Female | Week 90 (Nx) | 3/17/2023 |
| 7 | 63696 | 61.31 | WT | C57BL/6NCrl | Female | Week 90 (Nx) | 3/17/2023 |
| 8 | 63697 | 63.64 | WT | C57BL/6NCrl | Female | Week 90 (Nx) | 3/17/2023 |
| 9 | 63257 | 50.79 | WT | C57BL/6NCrl | Male | Week 96 (Nx) | 3/15/2023 |
| 10 | 63436 | 55.34 | WT | C57BL/6NCrl | Male | Week 93 (Nx) | 3/15/2023 |
| 11 | 63437 | 56.48 | WT | C57BL/6NCrl | Male | Week 93 (Nx) | 3/15/2023 |
| 12 | 63438 | 56.63 | WT | C57BL/6NCrl | Male | Week 93 (Nx) | 3/15/2023 |
| 13 | 63602 | 60.09 | WT | C57BL/6NCrl | Male | Week 92 (Nx) | 3/15/2023 |
| 14 | 63623 | 68.84 | WT | C57BL/6NCrl | Male | Week 92 (Nx) | 3/15/2023 |
| 15 | 63624 | 62.20 | WT | C57BL/6NCrl | Male | Week 92 (Nx) | 3/15/2023 |
| 16 | 63698 | 52.19 | WT | C57BL/6NCrl | Male | Week 90 (Nx) | 3/15/2023 |
| 17 | 73504 | 26.76 | WT | C57BL/6NCrl | Female | Week 16 (Nx) | 11/8/2023 |
| 18 | 73505 | 35.97 | WT | C57BL/6NCrl | Female | Week 16 (Nx) | 11/8/2023 |
| 19 | 73506 | 34.35 | WT | C57BL/6NCrl | Female | Week 16 (Nx) | 11/8/2023 |
| 20 | 73507 | 25.90 | WT | C57BL/6NCrl | Female | Week 16 (Nx) | 11/8/2023 |
| 21 | 73646 | 33.21 | WT | C57BL/6NCrl | Female | Week 16 (Nx) | 11/22/2023 |
| 22 | 73647 | 29.71 | WT | C57BL/6NCrl | Female | Week 16 (Nx) | 11/22/2023 |
| 23 | 73648 | 31.56 | WT | C57BL/6NCrl | Female | Week 16 (Nx) | 11/22/2023 |
| 24 | 73649 | 32.17 | WT | C57BL/6NCrl | Female | Week 16 (Nx) | 11/22/2023 |
| 25 | 73494 | 40.74 | WT | C57BL/6NCrl | Male | Week 16 (Nx) | 11/8/2023 |
| 26 | 73498 | 37.66 | WT | C57BL/6NCrl | Male | Week 16 (Nx) | 11/8/2023 |
| 27 | 73499 | 39.91 | WT | C57BL/6NCrl | Male | Week 16 (Nx) | 11/8/2023 |
| 28 | 73500 | 41.32 | WT | C57BL/6NCrl | Male | Week 16 (Nx) | 11/8/2023 |
| 29 | 73636 | 38.17 | WT | C57BL/6NCrl | Male | Week 16 (Nx) | 11/22/2023 |
| 30 | 73644 | 40.97 | WT | C57BL/6NCrl | Male | Week 16 (Nx) | 11/22/2023 |
| 31 | 73651 | 35.59 | WT | C57BL/6NCrl | Male | Week 16 (Nx) | 11/22/2023 |
| 32 | 73652 | 30.32 | WT | C57BL/6NCrl | Male | Week 16 (Nx) | 11/22/2023 |

**Supplementary Note 1. Cardiolipin maturity score calculation.** Since there is no standardized calculation for a cardiolipin maturity score. Here, we define a semi-quantitative index to reflect the degree of cardiolipin remodeling toward mature, linoleate-enriched species. Each cardiolipin molecular species was assigned weighted points based on acyl chain composition:

- Number of 18:2 (linoleic acid) chains ()

+1 point per chain

- Number of other polyunsaturated fatty acid (PUFA) ()

+0.5 point per chain

- Total double bonds across all four chains (DBi)

+0.1 point per double bond

Cardiolipin maturity score (per species *i*)

Higher indicates a more “mature”, higher unsaturated CL composition.

Example:

For a cardiolipin species containing two 18:2, one 20:4, and one 18:1

(=2, =1, DB=2+2+4+1=9):

Classification thresholds:

- Nascent CL: S ≤ 2.6 (few/no 18:2; lower total saturation; typically ≥2 low-saturation chains)
- Mature CL: S ≥ 2.8 (≥2 linoleates and/or PUFA-rich; higher total unsaturation)
- Ambiguous cases: when chain identities are uncertain (sum composition with multiple valid parses), we report an S range (e.g., CL 72:1, S=3~4) and to classify mature if the lower bond ≥ ~2.8

All detailed scores and classifications were available in **Supplementary Table 2**.
